# Supplementary material for: Multicenter Real-World Data of Subsequent Chemotherapy after Progression to PARP Inhibitors in a Maintenance Relapse Setting
Source: MDPI journal article supplement (doi:10.3390/cancers14184414), 2022-09-11
Supplement: s1 [file s1]

**Table S1. Baseline characteristics and previous treatments in PS patients Subsequent Platinum-free regimens.**

|                                                                                         | <b>Total<br/>N=7</b> |
|-----------------------------------------------------------------------------------------|----------------------|
| Age at diagnosis (years), Median [IQR]                                                  | 66.4<br>[61.8;67.9]  |
| Histology, n (%): HGSOc                                                                 | 7 (100.0%)           |
| BRCA mutational status, n (%):                                                          |                      |
| Positive                                                                                | 1 (14.3%)            |
| WT                                                                                      | 4 (57.1%)            |
| Variants of unknown significance (VUS)                                                  | 2 (28.6%)            |
| Other HRR genes mut, n (%):                                                             |                      |
| Positive                                                                                | 1 (14.3%)            |
| Pt-based chemo immediately previous to PARPi, n (%):                                    |                      |
| Pt monotherapy                                                                          | 1 (14.3%)            |
| Pt doublet                                                                              | 6 (85.7%)            |
| Months from last cycle of prior Pt to initiation of Pt immediately pre-PARPi, n (%):    |                      |
| 6-12m                                                                                   | 2 (28.6%)            |
| > 12m                                                                                   | 4 (57.1%)            |
| Non-available                                                                           | 1 (14.3%)            |
| Number of previous lines to PARPi (including the immediately previous),<br>Median [IQR] | 2.0 [2.0;3.0]        |
| Number of previous lines to PARPi (including the immediately previous), n (%):          |                      |
| = 2                                                                                     | 4 (57.1%)            |
| > 2                                                                                     | 3 (42.9%)            |
| Number of cycles of Pt-based chemo immediately previous to PARPi, Median<br>[IQR]       | 6.0 [5.0;6.5]        |
| Best response to Pt-based chemo immediately previous to PARPi, n (%):                   |                      |
| PR                                                                                      | 6 (85.7%)            |
| SD                                                                                      | 1 (14.3%)            |
| Months with Pt-based CT treatment, Median [IQR]                                         | 4.2 [3.0;5.1]        |
| PARPi, n (%):                                                                           |                      |
| olaparib                                                                                | 2 (28.6%)            |
| niraparib                                                                               | 4 (57.1%)            |
| rucaparib                                                                               | 1 (14.3%)            |
| Months with PARPi, Median [IQR]                                                         | 7.4 [5.6;8.5]        |
| Prior PARPi, n (%):                                                                     |                      |
| Yes                                                                                     | 1 (14.3%)            |
| No                                                                                      | 6 (85.7%)            |
| Months from finishing Pt pre-PARPi to Pt pre-PARPi progression, Median [IQR]            | 8.4 [7.2;9.3]        |

Pt: platinum

**Table S2. Baseline characteristics and previous treatments in PS patients receiving subsequent platinum according to PFI.**

|                                                                                      | PFI 6-12 months<br>N=33 | PFI ≥ 12 months<br>N=41 | p              |
|--------------------------------------------------------------------------------------|-------------------------|-------------------------|----------------|
| Age at diagnosis (years), Median [IQR]                                               | 59.7<br>[55.9;67.5]     | 61.2<br>[54.0;69.2]     | 0.952          |
| Histology, n (%):                                                                    |                         |                         | 1.000          |
| HGSOc                                                                                | 31 (93.9%)              | 39 (95.1%)              |                |
| HGEOc                                                                                | 2 (6.1%)                | 2 (4.9%)                |                |
| BRCA mutational status, n (%):                                                       |                         |                         | 0.024          |
| Positive                                                                             | 10 (30.3%)              | 25 (61.0%)              |                |
| WT                                                                                   | 21 (63.6%)              | 14 (34.1%)              |                |
| Variants of unknown significance (VUS)                                               | 2 (6.1%)                | 2 (4.9%)                |                |
| Other HRR genes mut, n (%):                                                          |                         |                         | 0.081          |
| Positive                                                                             | 1 (3.4%)                | 6 (17.1%)               |                |
| Pt-based chemo immediately previous to PARPi, n (%):                                 |                         |                         | 1.000          |
| Pt monotherapy                                                                       | 3 (9.1%)                | 4 (9.8%)                |                |
| Pt doublet                                                                           | 30 (90.9%)              | 37 (90.2%)              |                |
| Months from last cycle of prior Pt to initiation of Pt immediately pre-PARPi, n (%): |                         |                         | 0.546          |
| 6-12m                                                                                | 15 (45.5%)              | 16 (39.0%)              |                |
| > 12m                                                                                | 17 (51.5%)              | 25 (61.0%)              |                |
| Non-available                                                                        | 1 (3.0%)                | 0 (0.0%)                |                |
| Number of previous lines to PARPi (including the immediately previous), Median [IQR] | 2.0 [2.0;3.0]           | 2.0 [2.0;3.0]           | 0.789          |
| Number of previous lines to PARPi (including the immediately previous), n (%):       |                         |                         | 0.954          |
| = 2                                                                                  | 19 (57.6%)              | 25 (61.0%)              |                |
| > 2                                                                                  | 14 (42.4%)              | 16 (39.0%)              |                |
| Number of cycles of Pt-based chemo immediately previous to PARPi, Median [IQR]       | 6.0 [5.0;6.0]           | 6.0 [5.0;6.0]           | 0.783          |
| Best response to Pt-based chemo immediately previous to PARPi, n (%):                |                         |                         | 0.061          |
| CR                                                                                   | 4 (12.1%)               | 14 (34.1%)              |                |
| PR                                                                                   | 27 (81.8%)              | 24 (58.5%)              |                |
| SD                                                                                   | 2 (6.1%)                | 3 (7.3%)                |                |
| Months with Pt-based CT treatment, Median [IQR]                                      | 4.7 [3.5;5.6]           | 4.6 [3.7;5.1]           | 0.683          |
| PARPi, n (%):                                                                        |                         |                         | 0.060          |
| olaparib                                                                             | 14 (42.4%)              | 26 (63.4%)              |                |
| niraparib                                                                            | 19 (57.6%)              | 14 (34.1%)              |                |
| rucaparib                                                                            | 0 (0.0%)                | 1 (2.4%)                |                |
| Months with PARPi, Median [IQR]                                                      | 6.5 [5.6;8.3]           | 14.7<br>[11.8;22.2]     | <0.001         |
| Prior PARPi, n (%):                                                                  |                         |                         | 0.435          |
| No                                                                                   | 29 (96.7%)              | 39 (100.0%)             |                |
| maybe                                                                                | 1 (3.3%)                | 0 (0.0%)                |                |
| Months from finishing Pt pre-PARPi to Pt pre-PARPi progression, Median [IQR]         | 8.8 [6.8;9.8]           | 17.1<br>[13.6;22.6]     | <0.001         |
| Months from finishing Pt pre PARPi to CT post PARPi initiation, Median [IQR]         | 9.5 [7.4;10.9]          | 19.4<br>[15.2;23.1]     | <0.001         |
| Included in the OREO study, n (%): Yes                                               | 0 (.%)                  | 5 (100.0%)              | .              |
| Best response to CT administered after PARPi progression, n (%):                     |                         |                         |                |
| CR                                                                                   | 6 (8.1%)                | 2 (6.1%)                | 4 (9.8%)       |
| PR                                                                                   | 25 (33.8%)              | 9 (27.3%)               | 16<br>(39.0%)  |
| SD                                                                                   | 20 (27.0%)              | 10 (30.3%)              | 10<br>(24.4%)  |
| PROG                                                                                 | 23 (31.1%)              | 12 (36.4%)              | 11<br>(26.8%)  |
| OS*                                                                                  | 20.6 (13.6-28.9)        | 17.2 (13-NA)            | 20.6 (13.2-NA) |
| PFS*                                                                                 | 6.6 (6-9.2)             | 6.1 (4.9-9.9)           | 7.2 (6.5-10.8) |

Pt: platinum; PFI: progression-free interval

**Table S3. ORR, PFS and OS in PR patients.**

|                                                                  | <b>Total<br/>N=30</b> | <b>ssq Pt<br/>N=13</b> | <b>ssq non-Pt<br/>N=17</b> |
|------------------------------------------------------------------|-----------------------|------------------------|----------------------------|
| Best response to CT administered after PARPi progression, n (%): |                       |                        |                            |
| PR                                                               | 14 (46.7%)            | 6 (46.2%)              | 8 (47.1%)                  |
| SD                                                               | 5 (16.7%)             | 1 (7.7%)               | 4 (23.5%)                  |
| PROG                                                             | 11 (36.7%)            | 6 (46.2%)              | 5 (29.4%)                  |
| OS                                                               | 13 (8-15.4)           | 10.1 (6.3-NA)          | 14.4 (10.7-NA)             |
| PFS                                                              | 5.1 (4.4-7)           | 4.7 (3.4-NA)           | 6.8 (5.1-NA)               |

Pt: platinum; ssq: subsequent
